# Supplementary material
Source: Royal Society of Chemistry journal article supplement (doi:10.1039/d5ta08824k)
Supplement: d5ta08824k1.pdf [file d5ta08824k1.pdf]

# Photoelectron extraction in BiOI: an atomistic perspective

*Ribhu Bhatia, Sebastiano Merchiori, Simone Meloni*

Department of Chemical and Pharmaceutical Sciences, Università of Ferrara, Via Luigi Borsari

46, I-44121 Ferrara, Italy

S1: Charge density difference (CDD) maps

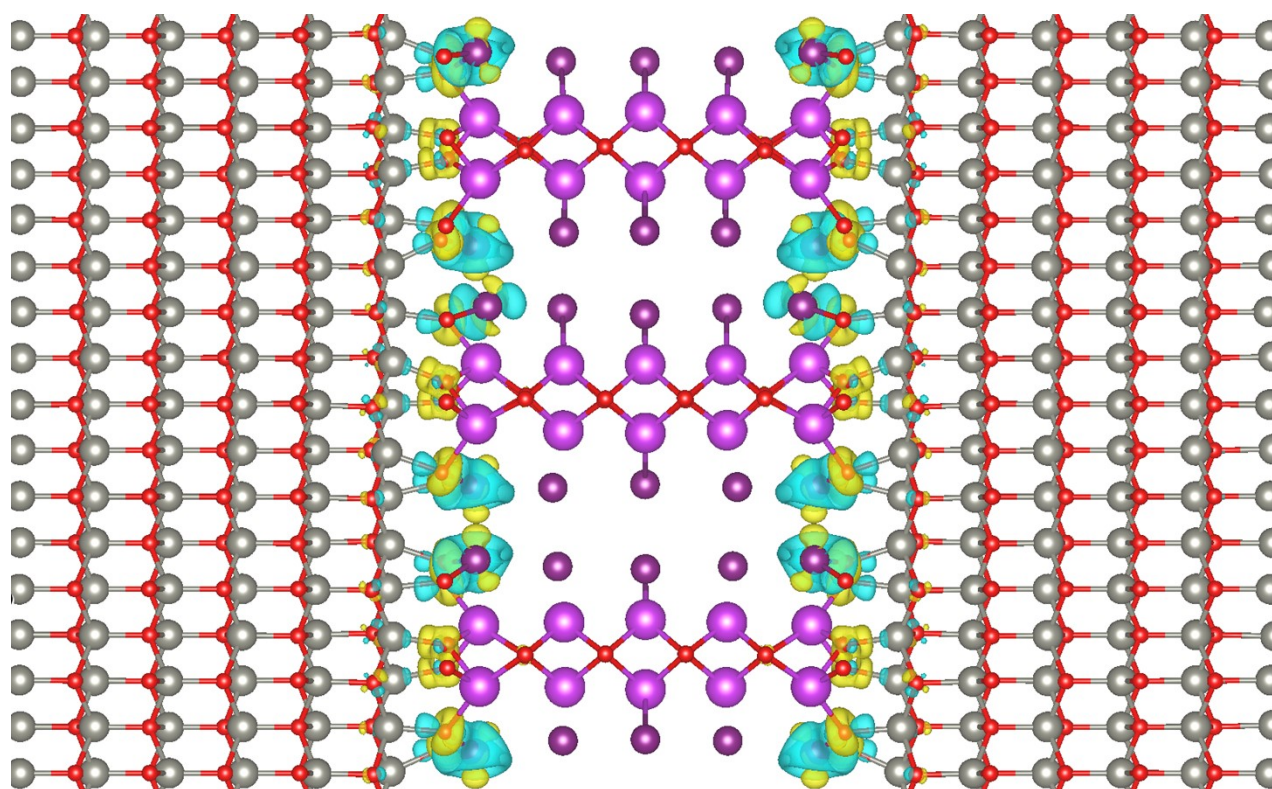

**Figure S1:** Charge density difference between the composite structure and BiOI and both the ZnO structures computed as  $\Delta\rho(x) = \rho_{\text{ZnO}^1/\text{Bi}/\text{ZnO}^2}(x) - (\rho_{\text{ZnO}^1} + \rho_{\text{Bi}} + \rho_{\text{ZnO}^2})$ . Here, yellow lobes correspond to charge accumulation, whereas cyan lobes indicate charge depletion.

Table S1: Average Bader Charge

| I in bulk BiOI | I at the BiOI/ZnO interface | O in bulk ZnO | O bonded with I atoms at the BiOI/ZnO interface |
|----------------|-----------------------------|---------------|-------------------------------------------------|
| -0.51 e        | 1.93 e                      | -1.22 e       | -1.65 e                                         |

S2: pDOS of BiOI/defected ZnO heterojunction.

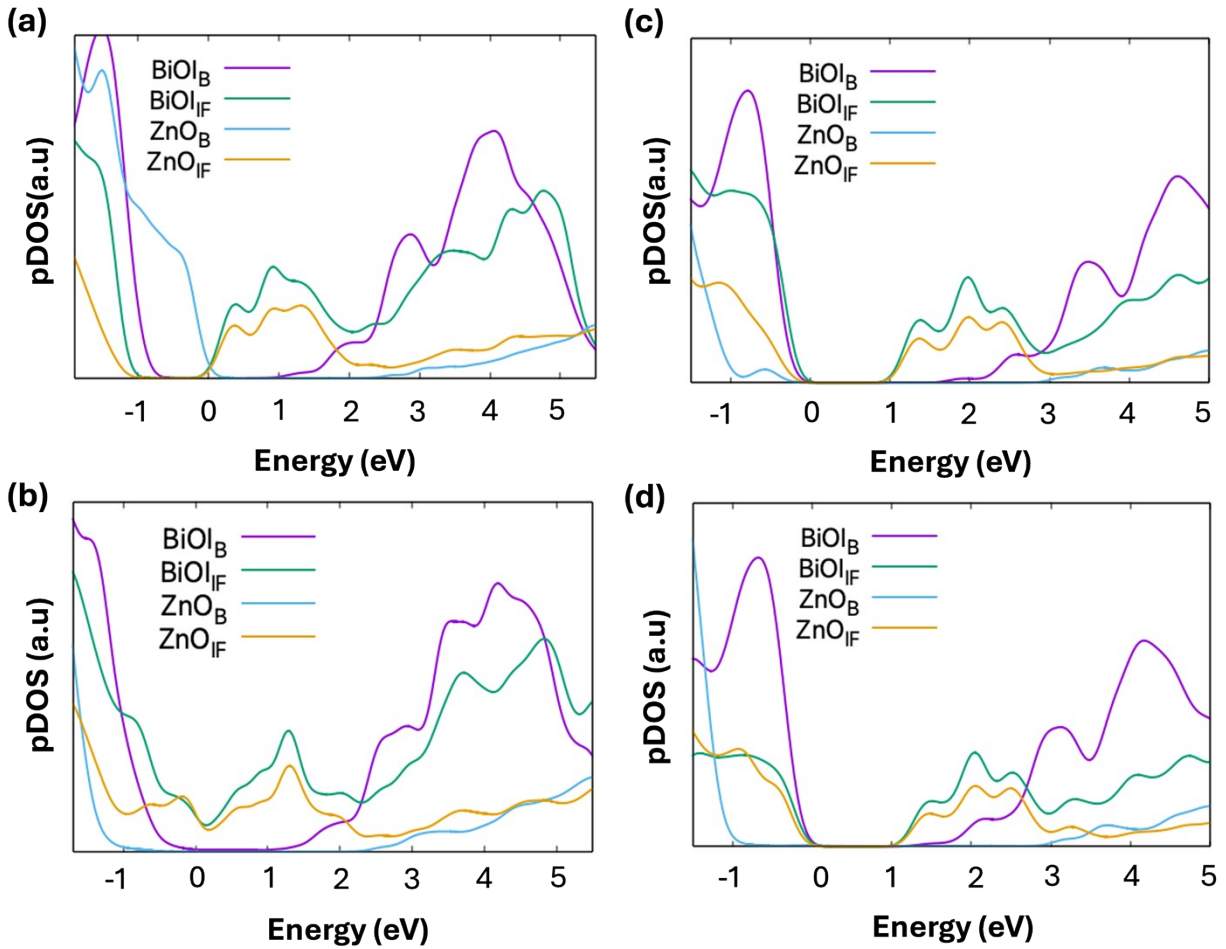

**Figure S2.** Density of states projected on the bulk (B) and interface (IF) layers of BiOI and defected ZnO: a)  $V_{Zn}''$  in the bulk; b)  $V_{Zn}''$  at the interface; c)  $O_i''$  in the bulk; d)  $O_i''$  at the interface.
